# Supplementary material
Source: Springer Nature journal article supplement (https://www.springermedizin.de/resource/supplementary/13256_2010_1497_MOESM5_ESM.pdf/9647772)

Se:6  
Im:5

[A]

[R]

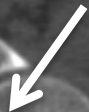

Supplement: MOESM5 [file 9647772]
